# Supplementary material
Source: PubMed Central journal article supplement (PMC5638708)
Supplement: NIHMS907771-supplement.pdf [file NIHMS907771-supplement.pdf]

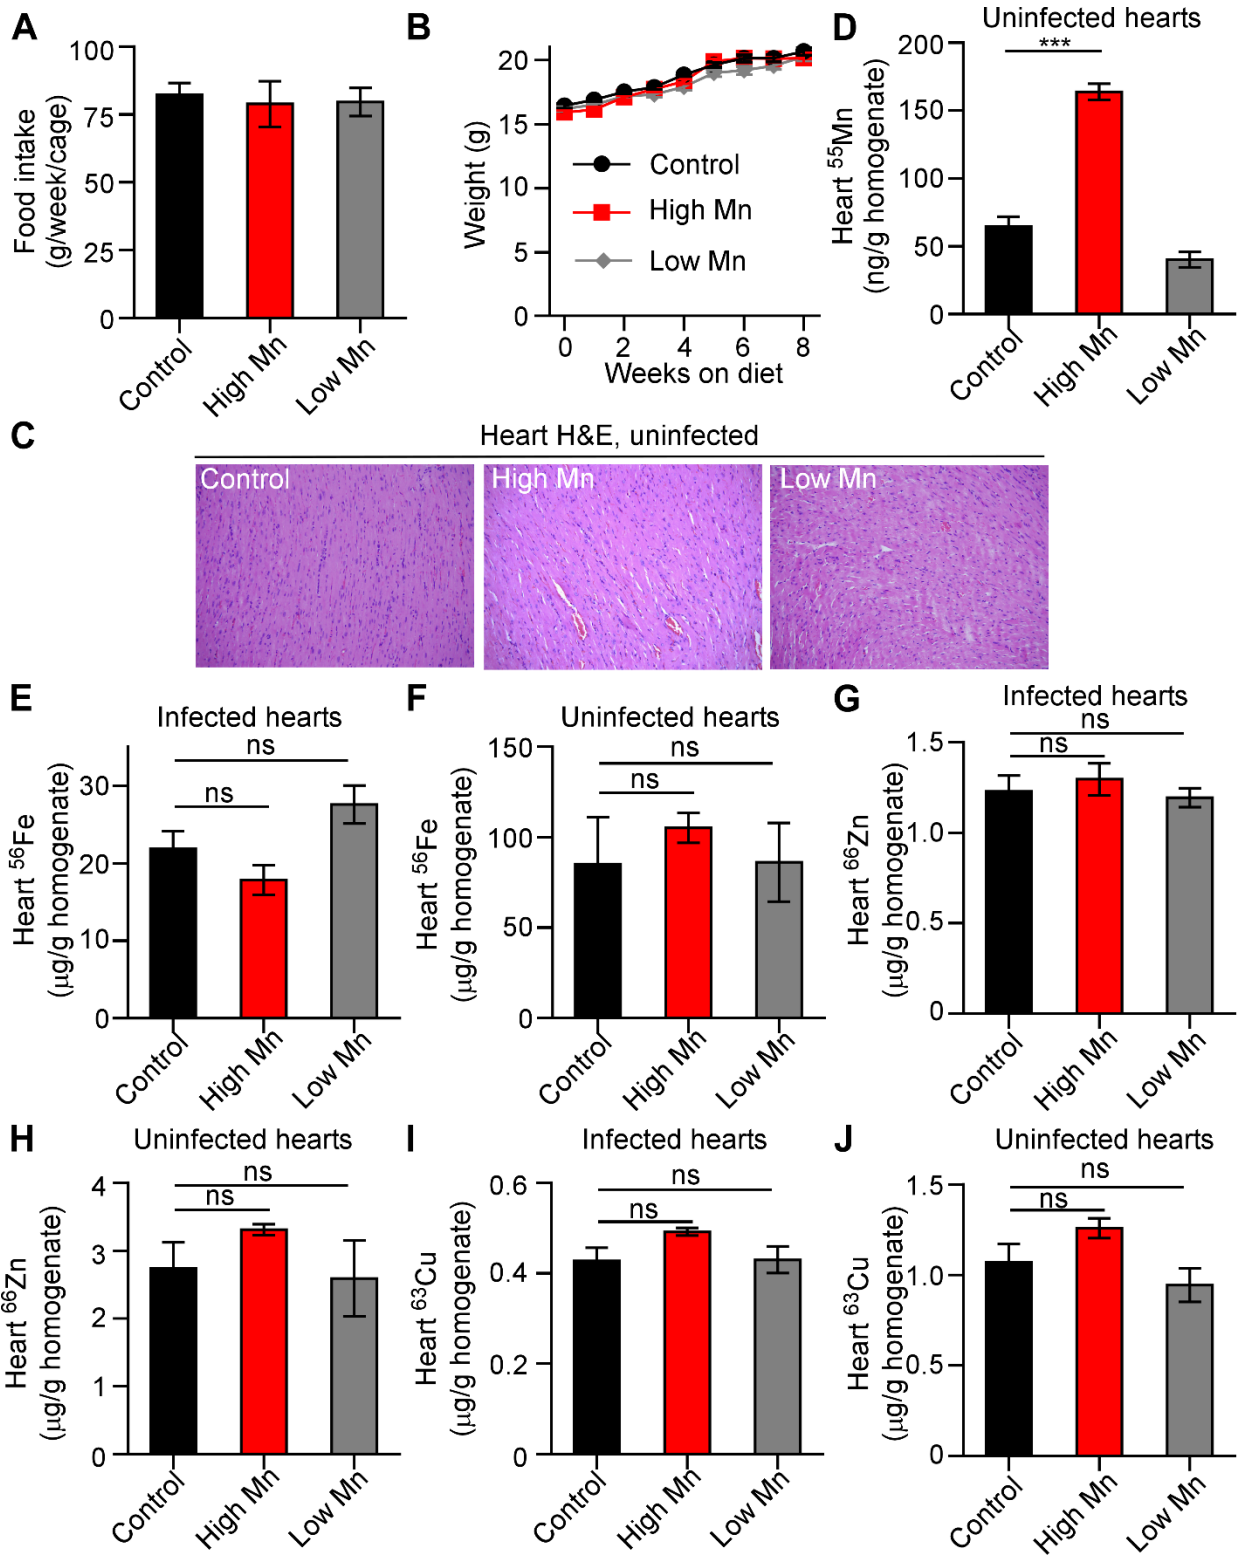

Supplementary Figure 1

**Supplementary Figure 1. Impact of dietary Mn on health and tissue metal levels, related to Figure 1.** C57BL/6 (WT) mice were fed control, high Mn, or low Mn diet for eight weeks. **(A)** Average food intake (grams consumed/cage/week) over the diet timecourse.  $N = 2$  cages per diet with diet weight measured once a week for eight weeks. Bars indicate mean and standard deviation. **(B)** Weight of mice over the diet timecourse.  $N = 10$ . Bars indicate mean and standard deviation. **(C)** Hematoxylin and eosin stained heart sections from uninfected mice fed control, high Mn, or low Mn diet for eight weeks. No histopathologic differences between groups were noted by a pathologist. Representative images are shown. These findings were replicated in three separate experiments. **(D-J)** Metals were assayed in heart homogenates by ICP-MS in uninfected mice or mice infected with *S. aureus* after 6 weeks on custom-synthesized diets. **(D)** Mn concentrations in uninfected hearts. **(E)** Fe levels in infected hearts. **(F)** Fe levels in uninfected hearts. **(G)** Zn levels in infected hearts. **(H)** Zn levels in uninfected hearts. **(I)** Copper (Cu) levels in infected hearts. **(J)** Cu levels in uninfected hearts. **(D-J)**  $N = 3$ . Bars depict mean and SEM. \*\*\*  $P < 0.001$ , ns = not significant by ANOVA with Dunnett's multiple comparisons test.

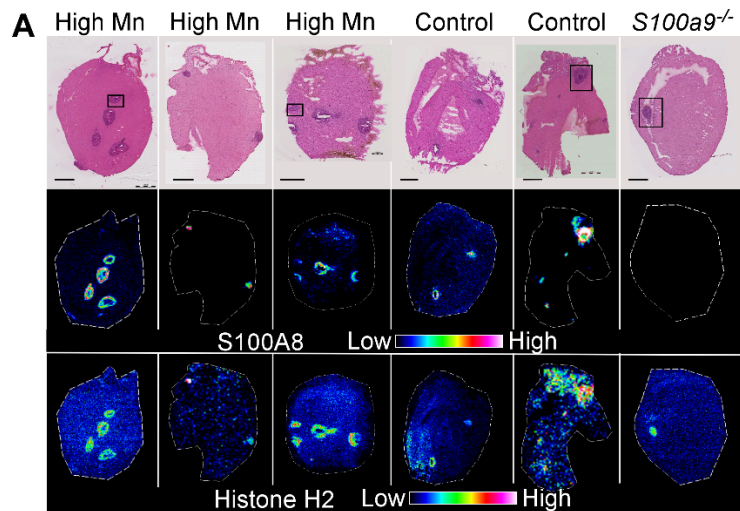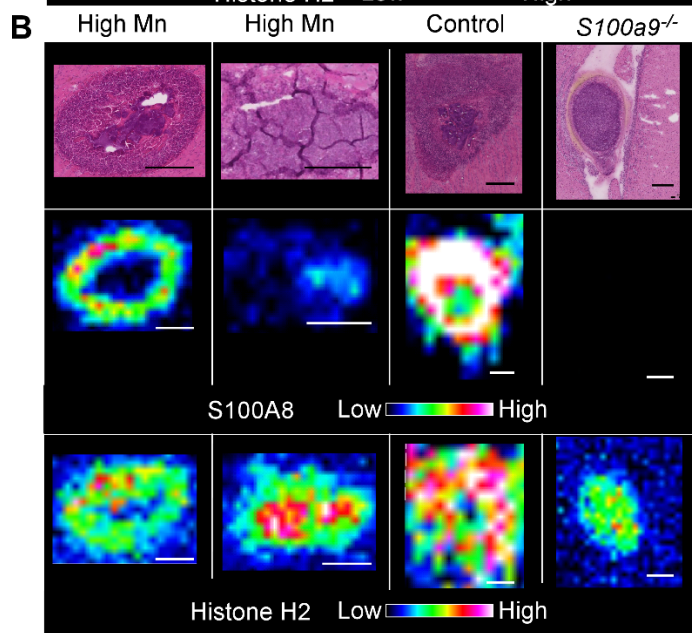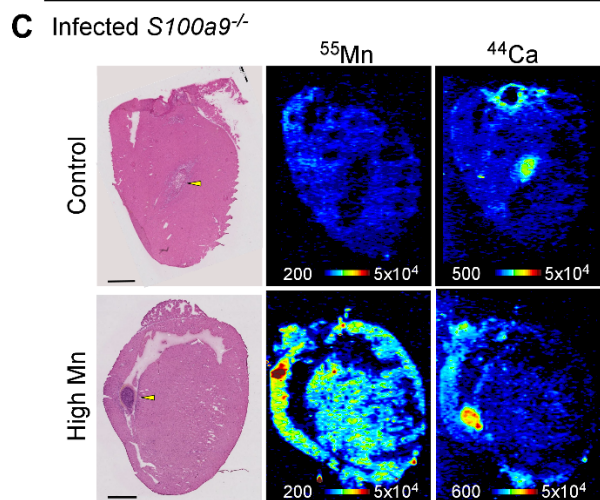

Supplementary Figure 2

**Supplementary Figure 2. Imaging of WT and *S100a9*<sup>-/-</sup> hearts, related to Figures 3 & 6. (A-B)** MALDI-IMS imaging of S100A8 and histone H2 in hearts from WT mice that were fed high Mn or control diet and infected with *S. aureus* for 4 days. One infected *S100a9*<sup>-/-</sup> heart is included as a control. H&E staining is shown for comparison. **(A)** Scale bars are 1 mm. **(B)** High power view of area inside the outlined box. Scale bars are 200 μm. Images were acquired at separate times; thus, the heat maps intensities are relative and a given color cannot be directly compared across images. **(C)** *S100a9*<sup>-/-</sup> mice were fed high Mn or control diet and infected with *S. aureus* WT for 4 days. Relative concentrations of Mn and Ca in infected heart sections were assessed by LA-ICP-MS. H&E stained serial sections are shown to the left. Scale bar is 1 mm.

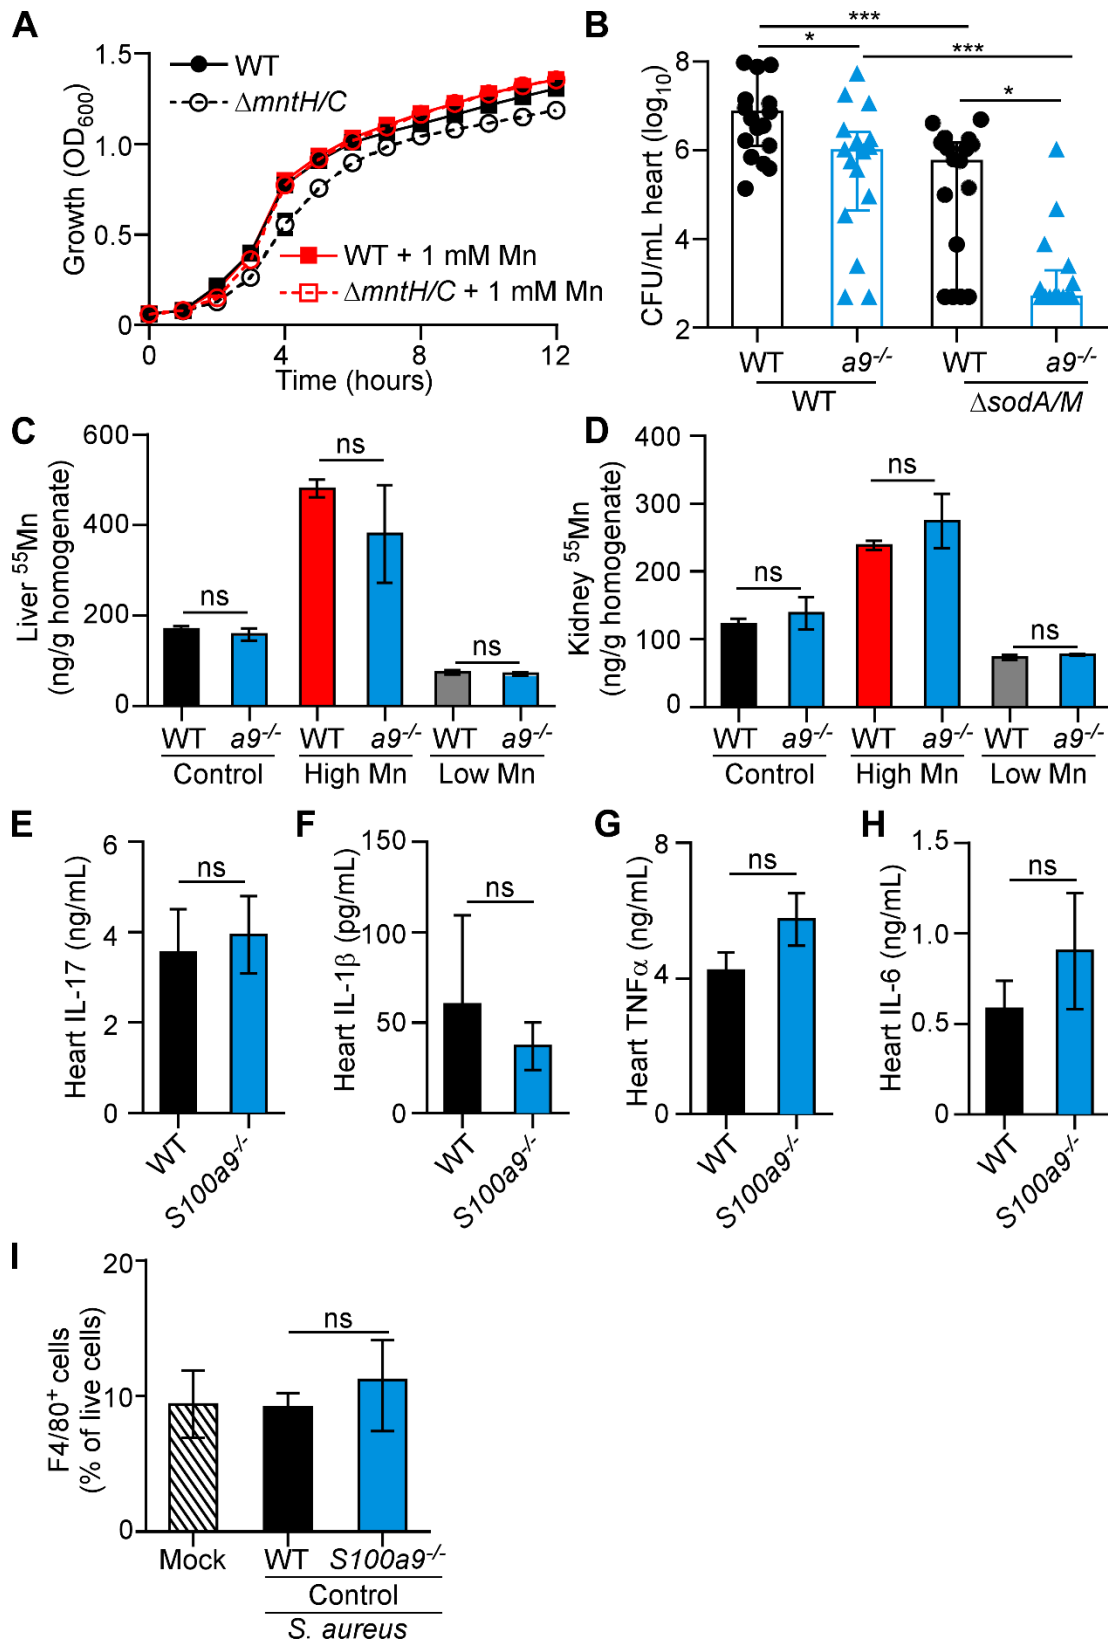

Supplementary Figure 3

**Supplementary Figure 3. Metal levels and inflammation in *S100a9*<sup>-/-</sup> mice, related to Figures 4 & 5.** (A) Growth of *S. aureus* WT or  $\Delta mntH/C$  with or without the addition of 1 mM MnCl<sub>2</sub>. Growth was measured by OD<sub>600</sub> over time. Data are combined from three independent experiments and depict the mean and S.E.M. (B) Heart bacterial burdens from WT and *S100a9*<sup>-/-</sup> mice provided normal chow and infected for 4 days with *S. aureus* WT or  $\Delta sodA/M$ . *N* = 14. \*, *P* < 0.05; \*\*\*, *P* < 0.001 by one-way ANOVA with Tukey's multiple comparisons test. (C-D) Mn concentrations in infected homogenates were measured by inductively-coupled plasma mass spectrometry (ICP-MS). Organs were harvested from WT or *S100a9*<sup>-/-</sup> (*a9*<sup>-/-</sup>) mice fed high Mn, control, or low Mn diet and infected with *S. aureus* for 4 days. (C) Liver. (D) Kidney. *N* = 3. Bars depict mean and SEM. ns = not significant by ANOVA with Sidak's multiple comparisons test. (E-K) WT and *S100a9*<sup>-/-</sup> mice were infected with *S. aureus*, hearts were harvested 24 hours post-infection, and the indicated cytokines were measured in supernatants harvested from heart homogenates: (E) IL-17; (F) IL-1 $\beta$ ; (G) TNF $\alpha$ ; (H) IL-6. *N* = 9 (*S100a9*<sup>-/-</sup>), 10 (WT). (I) Flow cytometry quantification of F4/80+ cells from hearts harvested from WT and *S100a9*<sup>-/-</sup> mice infected with *S. aureus* for four days. Previous gate, live cells. *N* = 2 (mock), 3 (*S100a9*<sup>-/-</sup>), 3 (WT). (E-H) Bars depict mean and SEM. (I) Bars and error are median and interquartile range. ns = not significant by Student's *t*-test.

**A**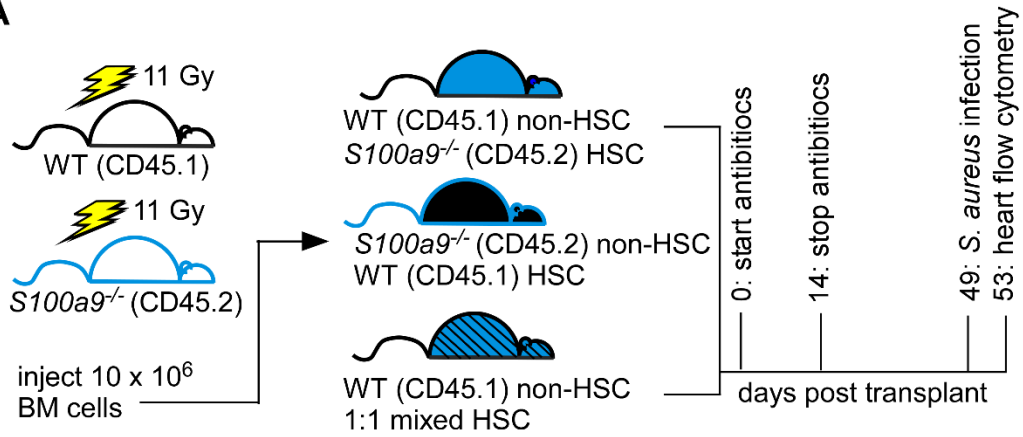**B**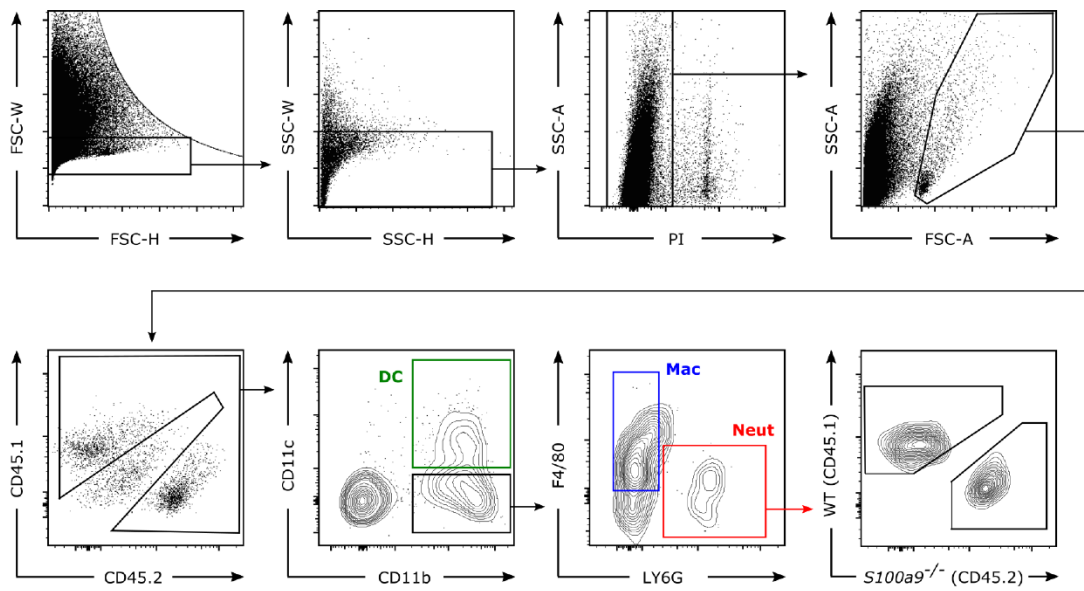**C**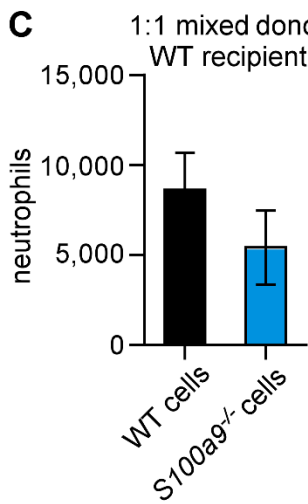**D**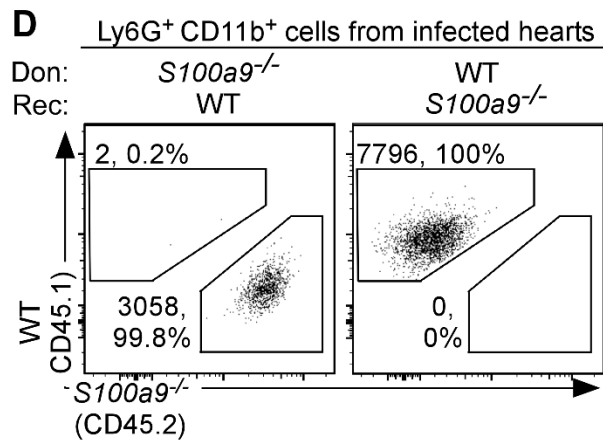**E**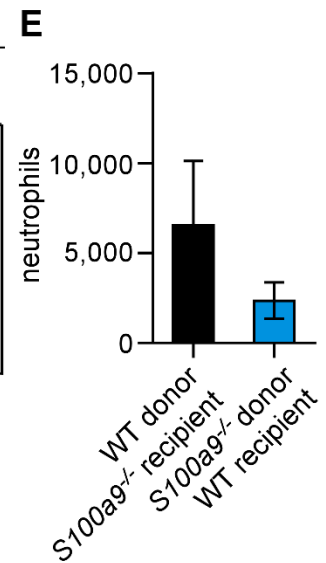

Supplementary Figure 4

**Supplementary Figure 4. Bone marrow transplant model and gating strategy for studying neutrophil recruitment, related to Figure 5.** (A) Design of bone marrow transplant experiments. (B) Gating strategy for distinguishing desired immune cells in heart homogenates. FSC = forward scatter; SSC = side scatter; PI = propidium iodide (live/dead marker). Lineages were distinguished as follows: CD45 for myeloid lineage cells, CD11b and CD11c for dendritic cells (DC), CD11b and F4/80 for macrophages (Mac), and CD11b Ly6G for neutrophils (neut). When appropriate, bone marrow lineages were delineated by CD45.1 or CD45.2. (C) Total neutrophil counts (Ly6G<sup>+</sup>CD11b<sup>+</sup>) for WT cells (CD45.1) and *S100a9*<sup>-/-</sup> cells (CD45.2) following BM transplantation of a 1:1 mix of WT congenic BM (CD45.1) and *S100a9*<sup>-/-</sup> BM (CD45.2) into WT mice. Previous gate, CD45<sup>+</sup> cells. *N* = 3. (D-E) Neutrophils (Ly6G<sup>+</sup>CD11b<sup>+</sup>) were quantified following reciprocal bone marrow transplantation (BMT) between WT congenic mice (CD45.1) and *S100a9*<sup>-/-</sup> mice (CD45.2). Mice were infected with *S. aureus* intravenously and hearts were harvested four days post infection. Previous gate, CD45<sup>+</sup> cells. (D) Representative flow plot. (E) Quantification of total neutrophils in hearts. Data are representative of *N* = 2 (*S100a9*<sup>-/-</sup> donor) and *N* = 4 (WT donor) from a single experiment. This experiment was repeated twice.



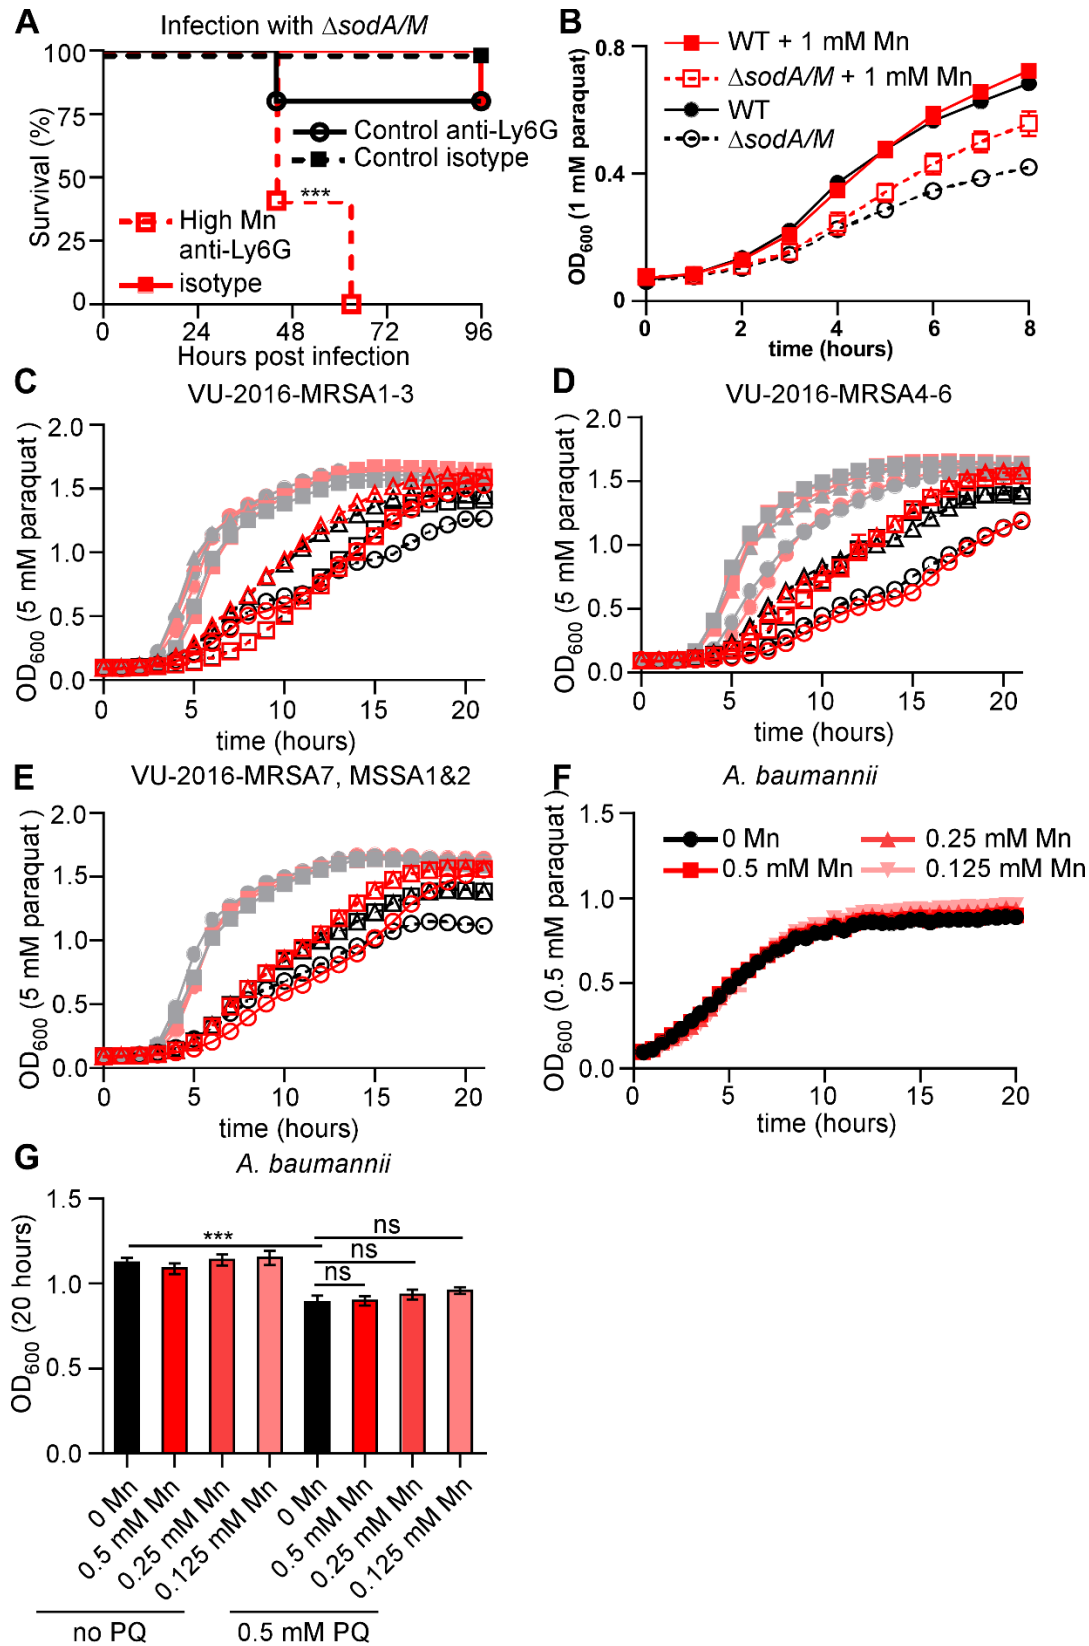

Supplementary Figure 5

**Supplementary Figure 5. The impact of Mn on growth in superoxide and virulence, related to Figure 7.** (A) Mice fed control diet or high Mn diet were treated with anti-Ly6G to deplete neutrophils or treated with an isotype control and infected with *S. aureus*  $\Delta$ sodA/M. Survival was monitored over four days.  $N = 5$  per group. \*\*\*,  $P < 0.001$  by log-rank test. (B) Growth of *S. aureus* WT or  $\Delta$ sodA/M in 1 mM paraquat with or without the addition of 1 mM MnCl<sub>2</sub>. Growth was measured by OD<sub>600</sub> over time. Data are combined from three independent experiments and depict the mean and S.E.M. (C-E). Growth of individual *S. aureus* clinical isolates as measured by OD<sub>600</sub>. Closed gray symbols indicate TSB alone and closed pink symbols are TSB + 1 mM MnCl<sub>2</sub>. Open symbols with dashed lines indicate treatment with 5 mM paraquat alone (black outline) or in combination with 1 mM MnCl<sub>2</sub> (red outline). Symbols represent the mean and error is shown as standard deviation. A single representative experiment of three is shown. (C) Square indicates isolate VU-2016-MRSA-1, triangle indicates isolate VU-2016-MRSA-2, circle indicates isolate VU-2016-MRSA-3. (D) Square indicates isolate VU-2016-MRSA-4, triangle indicates isolate VU-2016-MRSA-5, circle indicates isolate VU-2016-MRSA-6. (E) Square indicates isolate VU-2016-MRSA-7, triangle indicates isolate VU-2016-MSSA-1, circle indicates isolate VU-2016-MSSA-2. (F, G) Growth of *A. baumannii* 500  $\mu$ M paraquat. MnCl<sub>2</sub> was supplemented at 500  $\mu$ M, 250  $\mu$ M, or 125  $\mu$ M. Data are combined from three independent experiments and depict the mean and S.E.M. (F) Growth was measured over 20 hours. (G) OD<sub>600</sub> at 20 hours. \*\*\*,  $P < 0.001$ ; ns, not significant by one way ANOVA with Sidak's multiple comparisons test.

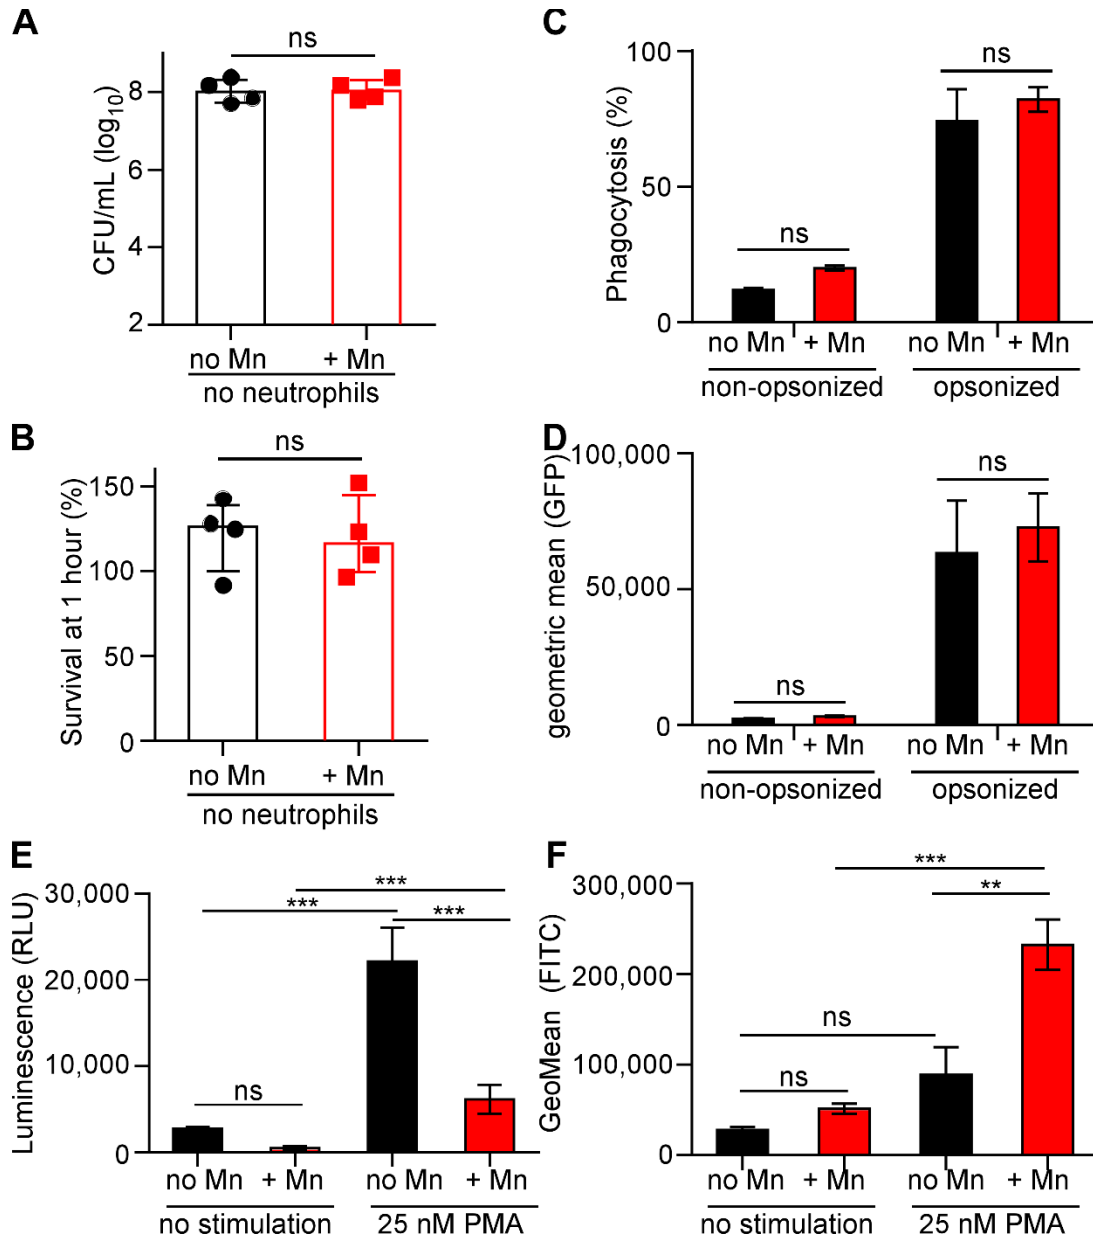

Supplementary Figure 6

**Supplementary Figure 6. Impact of Mn on neutrophil ROS production and phagocytosis, related to Figure 7. (A-B)** *S. aureus* growth with or without 1 mM MnCl<sub>2</sub> during the neutrophil killing assay. Bacterial growth in the absence of neutrophils is shown as colony forming units (A) or survival compared to the zero time point (B). *N* = 4 biological replicates. Bars depict median and interquartile intervals (C-D) Phagocytosis by human neutrophils of Newman *pOS1-P<sup>SarA</sup>-sodRBS-sGFP* pre-incubated in buffer only (non-opsonized) or in 20% fresh human serum (opsonized). Data are presented as (C) percent of GFP-positive neutrophils and (D) the geometric mean fluorescence of neutrophils. *N* = 4 donors. (E-F) Primary human neutrophil production of reactive oxygen species (ROS) in the presence or absence of 1 mM MnCl<sub>2</sub>. Production of ROS was stimulated by a 10 minute stimulation with 25 mM phorbol-12-myristate-13-acetate (PMA). (E) Detection of neutrophil-derived ROS by luminol, measured by luminescence, expressed as relative light units (RLU). *N* = 4 donors. (F) Detection of intracellular ROS by flow cytometry. *N* = 4 donors. (C-F) Bars depict mean and SEM. \*\*, *P* < 0.01; \*\*\*, *P* < 0.001; ns, not significant by *t*-test (A, B) or ANOVA with Tukey's multiple comparisons test (C-F).

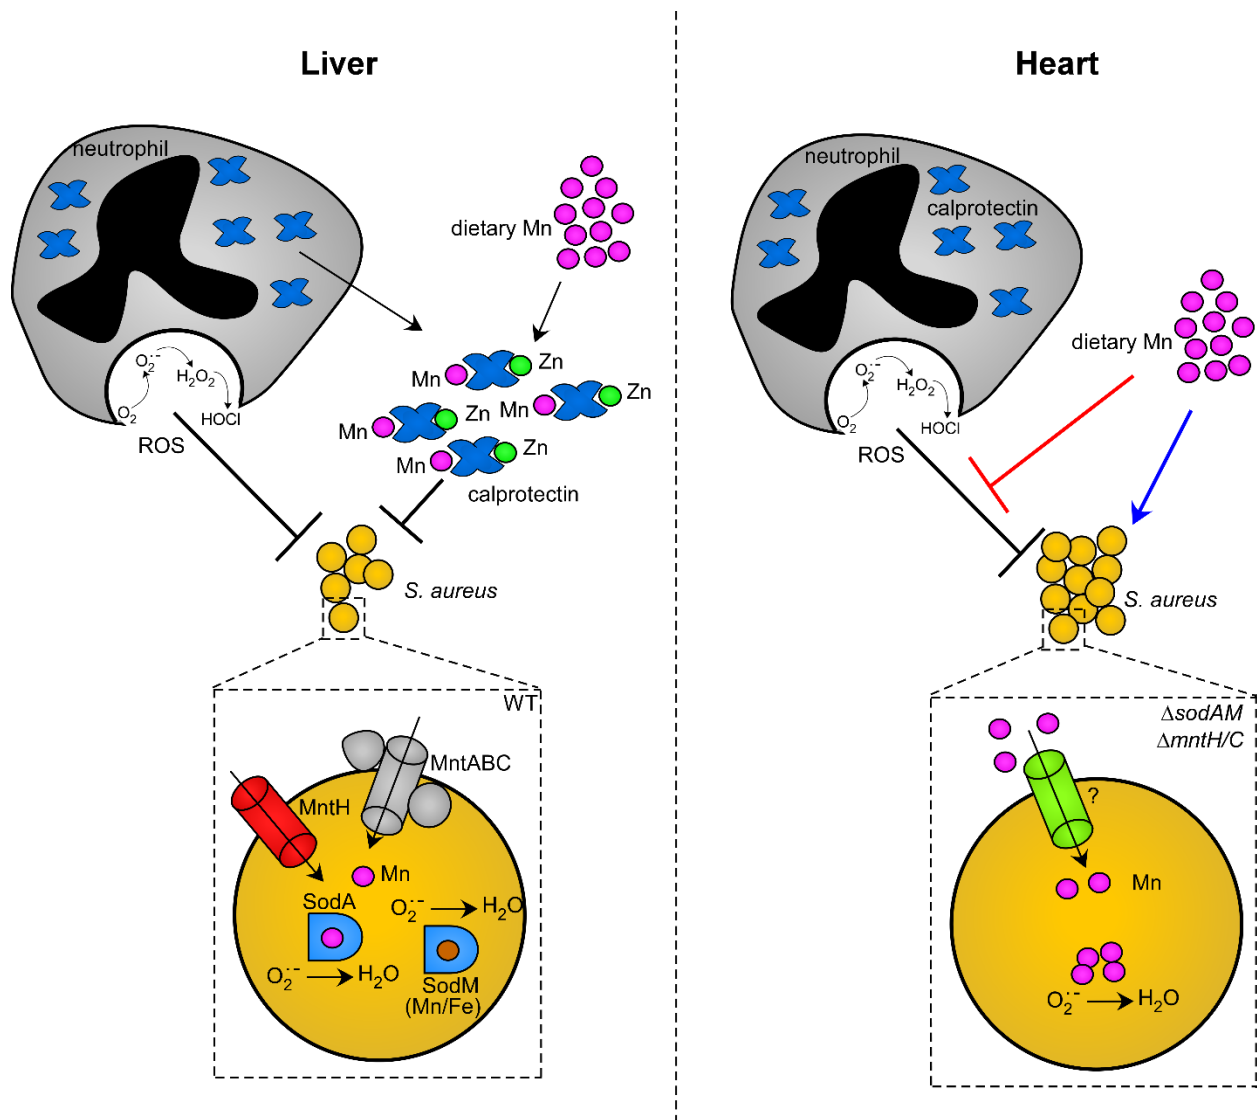

Supplementary Figure 7

**Supplementary Figure 7. Model for dietary Mn enhancing infection of the heart, related to Figure 7.** Left, model for infection of the liver. Neutrophils release calprotectin into the staphylococcal abscess (Corbin et al., 2008), binding excess dietary Mn to prevent *S. aureus* acquisition. ROS production by neutrophils effectively limits bacterial growth (Kehl-Fie et al., 2011). Left inset, in the liver *S. aureus* must express high affinity Mn importers to compete with calprotectin for Mn (Kehl-Fie et al., 2013). The superoxide dismutase enzymes SodA and SodM are important for detoxifying ROS in the liver (Kehl-Fie et al., 2013; Garcia et al., 2017). Right, model for infection of the heart. Calprotectin is not released from neutrophils into the abscess center. In a cell-intrinsic manner, calprotectin promotes neutrophil accumulation. Excess Mn from the diet, unbound by calprotectin, is bioavailable to *S. aureus* and enhances growth. Mn also reacts with ROS to decrease neutrophil killing. Right inset, *S. aureus*  $\Delta mntH/C$  has enhanced virulence in the setting of high bioavailable Mn because Mn import through unidentified low-affinity Mn importers is sufficient to support *S. aureus* growth. Abundant intracellular Mn detoxifies superoxide in *S. aureus*  $\Delta sodA/M$  to improve bacterial survival under ROS stress.
